# Supplementary material for: Synthesis of one-dimensional Bi2O2CO3–Bi(OHC2O4)·2H2O heterojunctions with excellent adsorptive and photocatalytic performance
Source: Royal Society of Chemistry journal article supplement (doi:10.1039/c6ra04014d), 2016-01-01
Supplement: c6ra04014d1.pdf [file c6ra04014d1.pdf]

# **Synthesis of one-dimensional $\text{Bi}_2\text{O}_2\text{CO}_3\text{-Bi}(\text{OHC}_2\text{O}_4)\cdot 2\text{H}_2\text{O}$ heterojunctions with excellent adsorptive and photocatalytic performance**

**Yin Peng<sup>\*a</sup>, Ke Ke Wang<sup>a</sup>, Pian-Pian Yu<sup>a</sup>, Ting Liu<sup>a</sup>, An Wu Xu<sup>\*b</sup>**

<sup>a</sup>The Key Laboratory of Functional Molecular Solids, Ministry of Education, College of Chemistry and Materials Science, Anhui Normal University, Wuhu 241000, China

Fax: (+86) 553-3937135; E-mail: [kimipeng@mail.ahnu.edu.cn](mailto:kimipeng@mail.ahnu.edu.cn).

<sup>b</sup>Division of Nanomaterials and Chemistry, Hefei National Laboratory for Physical Sciences at Microscale, Department of Chemistry, University of Science and Technology of China, Hefei 230026, P. R. China.

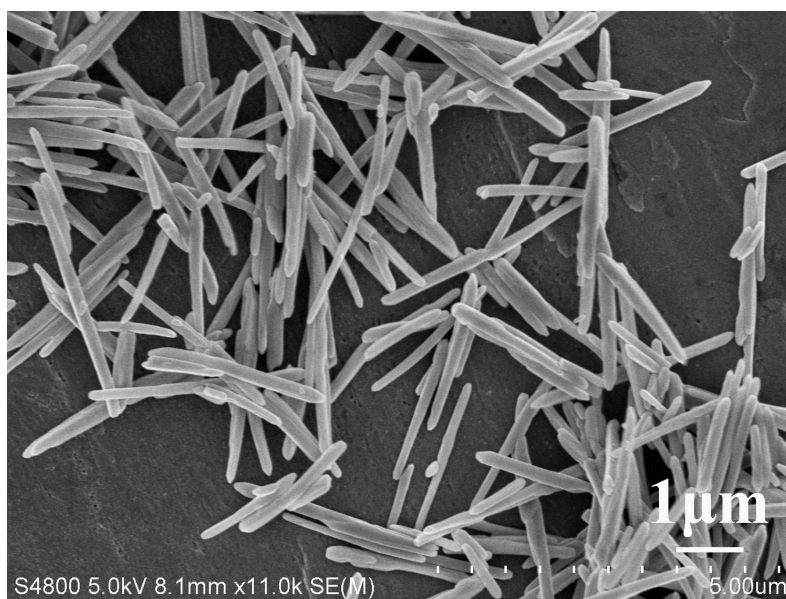

Fig. S1 FE-SEM images of pure  $\text{Bi}(\text{OHC}_2\text{O}_4)\cdot 2\text{H}_2\text{O}$ .

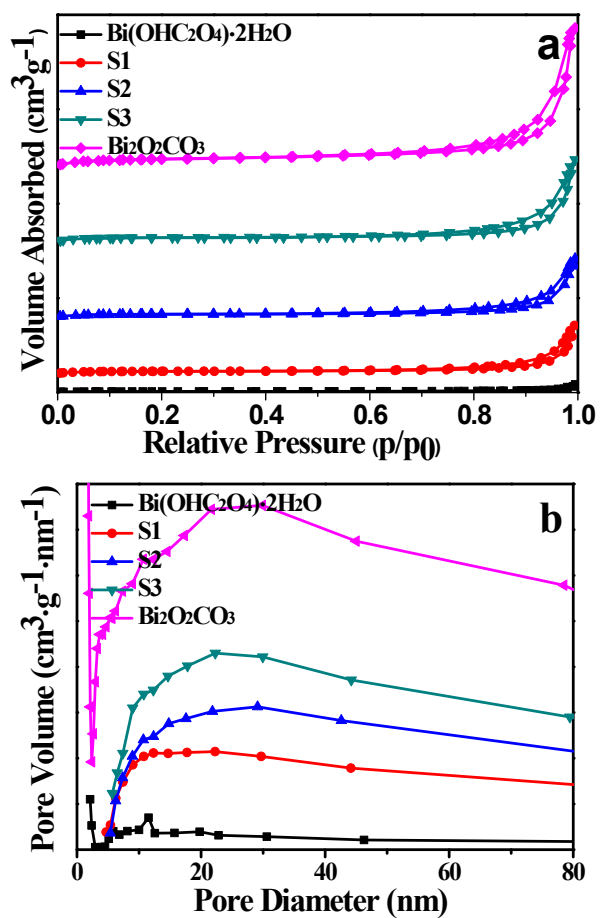

Fig. S2 (a) Nitrogen adsorption-desorption isotherm and (b) the corresponding pore size distribution of the different samples.

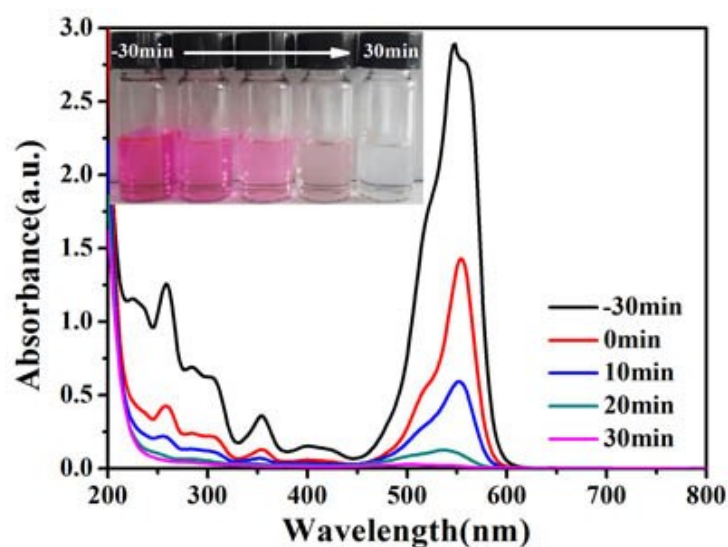

**Fig. S3** UV-Vis absorption spectra of RhB aqueous solutions using S2 as photocatalyst under solar light irradiation. Inset in b is photographs of RhB solutions by different reaction time.

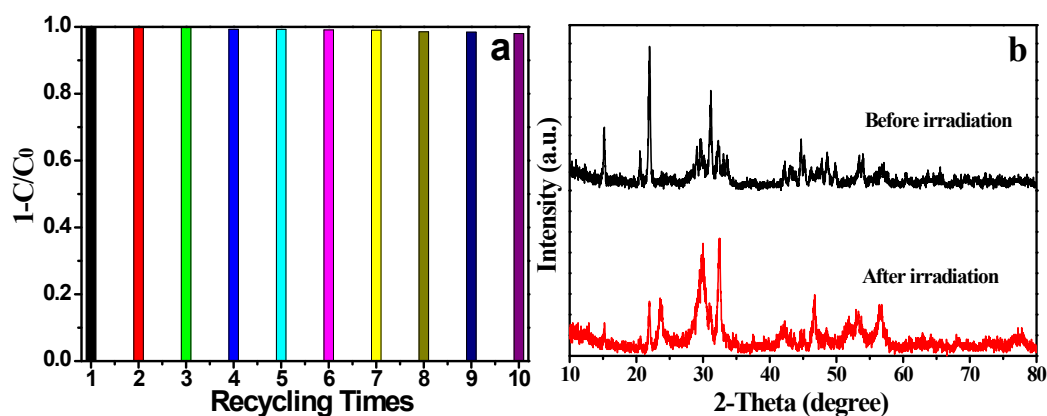

**Fig. S4** Cycling runs in the photodegradation of RhB in the presence of S2 heterostructure under solar light irradiation.

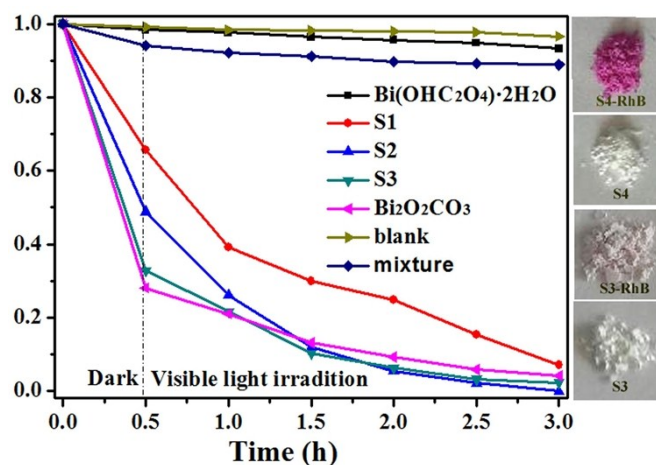

**Fig. S5** The degradation curve of RhB in the presence of different photocatalysts under visible light irradiation, the photographs of  $\text{Bi}_2\text{O}_2\text{CO}_3$  and S3 before and after photocatalysis inset in Fig.4S.

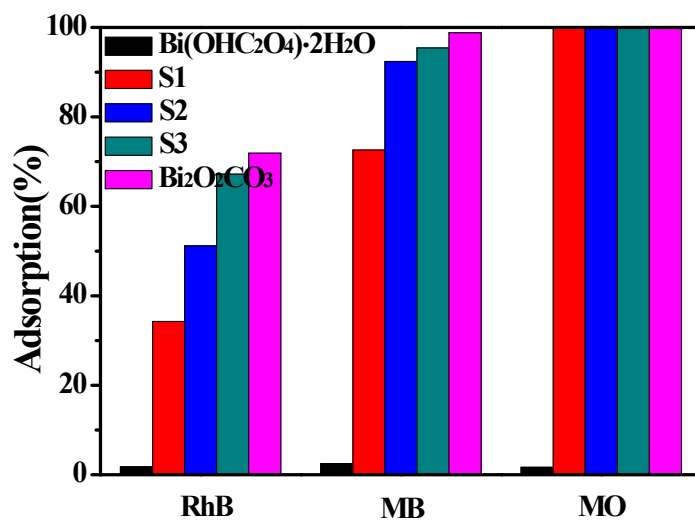

**Fig. S6** The adsorption bars of RhB, MB and MO using different samples as adsorbents, adsorptive time is 30 min and the concentration of dyes is 20 mg/L.

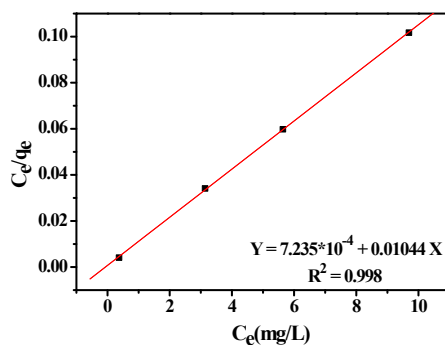

**Fig. S7** Langmuir isotherm models of S3.

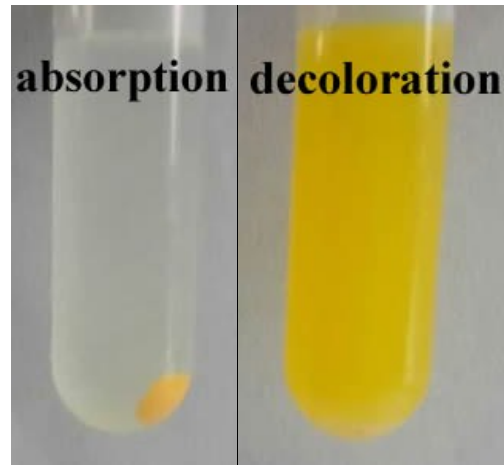

**Fig. S8** The adsorbent can be discolored in the ethanol solution.
